# Supplementary material for: Acoustic Cry Characteristics in Preterm Infants and Developmental and Behavioral Outcomes at 2 Years of Age
Source: PubMed Central journal article supplement (PMC9892956; doi:10.1001/jamanetworkopen.2022.54151), 2023-02-01
Supplement: jamanetwopen-e2254151-s001.pdf [file jamanetwopen-e2254151-s001.pdf]

## Supplemental Online Content

Manigault AW, Sheinkopf SJ, Carter BS, et al. Acoustic cry characteristics in preterm infants and developmental and behavioral outcomes at 2 years of age. *JAMA Netw Open*. 2023;6(2):e2254151. doi:10.1001/jamanetworkopen.2022.54151

**eTable.** Count of the Top 10 Most Important Variables Broken Down by Model Outcome, Utterance Type and Acoustic Variable Type

**eFigure 1.** Feature Importance Estimates From Models Predicting CBCL Composite Scores Using Cry Acoustic Characteristics (Only the Top 10 Features are Shown)

**eFigure 2.** Feature Importance Estimates From Models Predicting Bayley-III Composite Scores Using Cry Acoustic Characteristics (Only the Top 10 Features are Shown)

**eFigure 3.** Feature Importance Estimates From Models Predicting MCHAT Positive Autism Screen Using Cry Acoustic Characteristics (Only the Top 10 Features are Shown)

This supplemental material has been provided by the authors to give readers additional information about their work.

**eTable.** Count of the Top 10 Most Important Variables Broken Down by Model Outcome, Utterance Type and Acoustic Variable Type

|                                              | Total      | Energy    | Fundamental Frequency | Formants  | Utterance | Voicing  | Fricatives | Signal Quality |
|----------------------------------------------|------------|-----------|-----------------------|-----------|-----------|----------|------------|----------------|
| <b>CBCL</b>                                  |            |           |                       |           |           |          |            |                |
| Total Problem Behavior (>63) - long          | 10         | 3         | 1                     | 1         | 2         | 1        | 1          | 1              |
| Total Problem Behavior (>63) - short         | 10         | 1         | 0                     | 3         | 0         | 1        | 0          | 5              |
| Externalizing Problem Behavior (>63) - long  | 10         | 3         | 3                     | 1         | 1         | 1        | 1          | 0              |
| Externalizing Problem Behavior (>63) - short | 10         | 2         | 0                     | 3         | 0         | 1        | 0          | 4              |
| Internalizing Problem Behavior (>63) - long  | 10         | 3         | 1                     | 3         | 0         | 1        | 1          | 1              |
| Internalizing Problem Behavior (>63) - short | 10         | 1         | 1                     | 4         | 0         | 0        | 0          | 4              |
| <b>Bayley-III</b>                            |            |           |                       |           |           |          |            |                |
| Language Composite (<85) - long              | 10         | 6         | 1                     | 0         | 2         | 0        | 0          | 1              |
| Language Composite (<85) - short             | 10         | 3         | 2                     | 3         | 0         | 0        | 0          | 2              |
| Cognitive Composite (<85) - long             | 10         | 5         | 2                     | 2         | 0         | 0        | 0          | 1              |
| Cognitive Composite (<85) - short            | 10         | 3         | 3                     | 1         | 0         | 0        | 0          | 3              |
| Motor Composite (<85) - long                 | 10         | 3         | 3                     | 1         | 1         | 1        | 1          | 0              |
| Motor Composite (<85) - short                | 10         | 3         | 0                     | 3         | 0         | 0        | 0          | 4              |
| <b>M-CHAT</b>                                |            |           |                       |           |           |          |            |                |
| Positive Autism Screen - long                | 10         | 5         | 1                     | 1         | 1         | 1        | 0          | 1              |
| Positive Autism Screen - short               | 10         | 3         | 0                     | 4         | 1         | 1        | 0          | 1              |
|                                              |            |           |                       |           |           |          |            |                |
| <b>Total</b>                                 | <b>140</b> | <b>44</b> | <b>18</b>             | <b>30</b> | <b>8</b>  | <b>8</b> | <b>4</b>   | <b>28</b>      |
|                                              |            |           |                       |           |           |          |            |                |

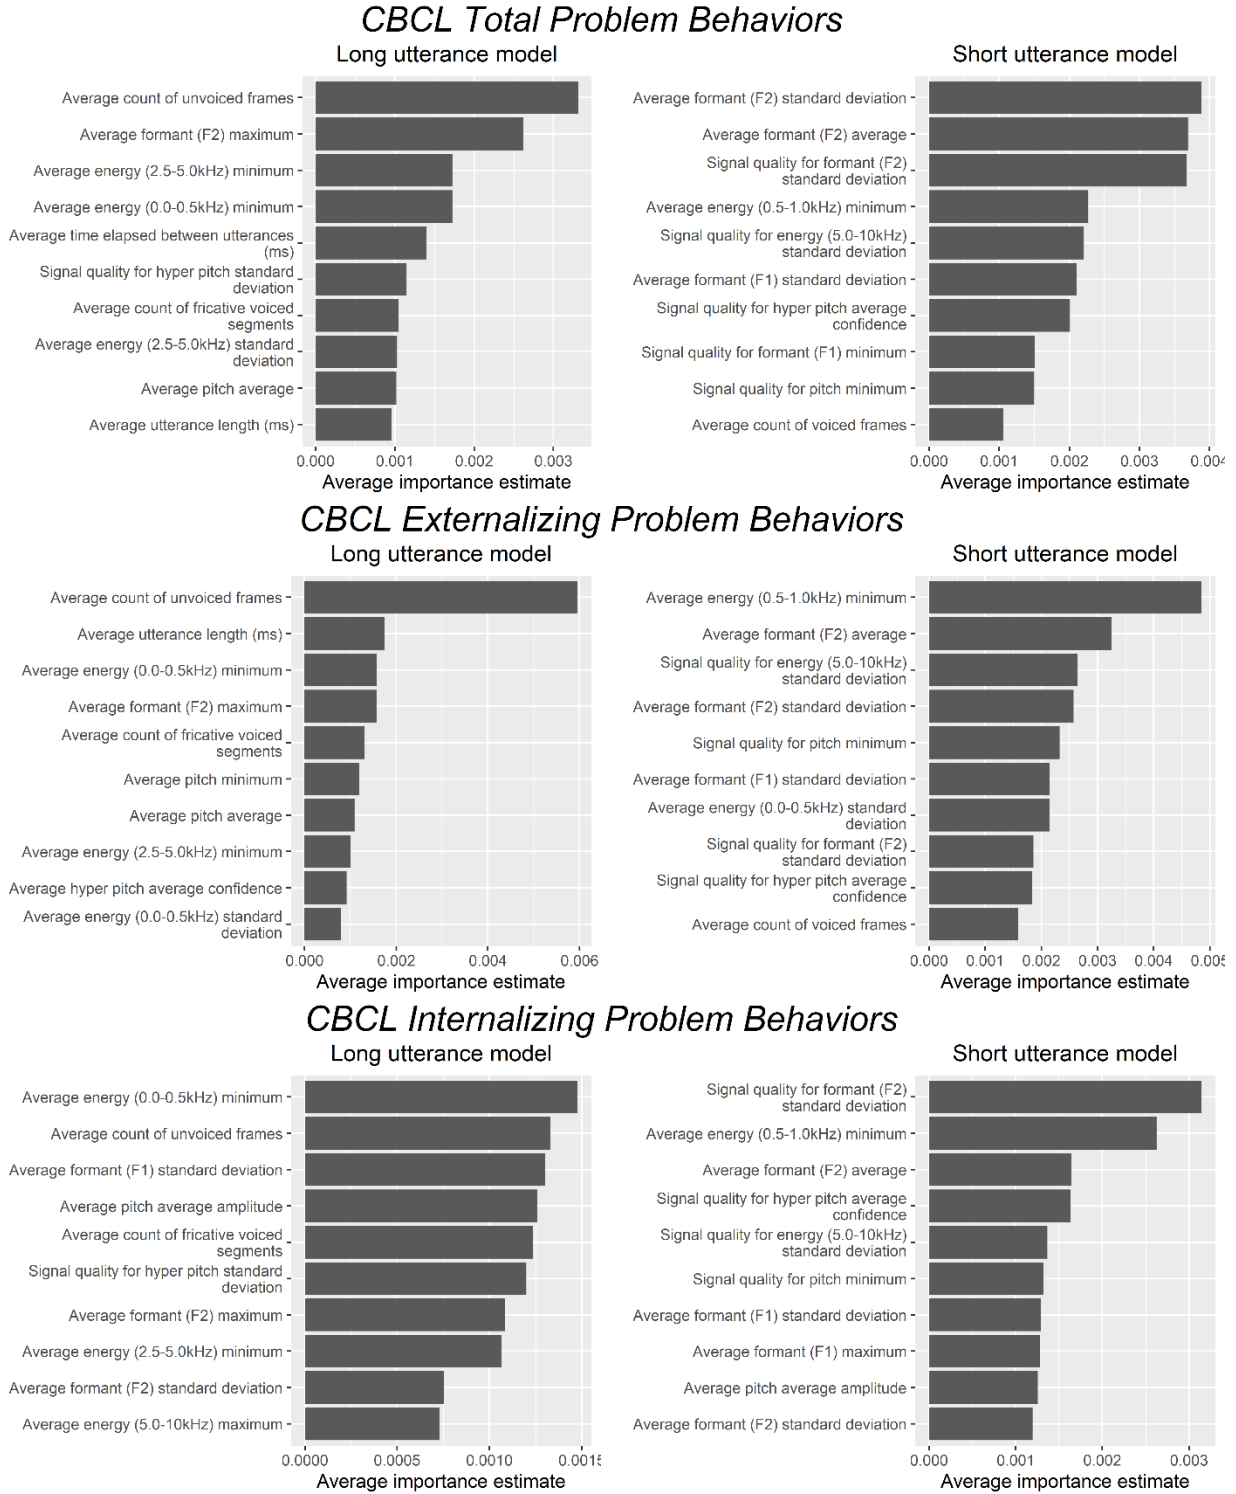

**eFigure 1.** Feature Importance Estimates From Models Predicting CBCL Composite Scores Using Cry Acoustic Characteristics (Only the Top 10 Features are Shown)

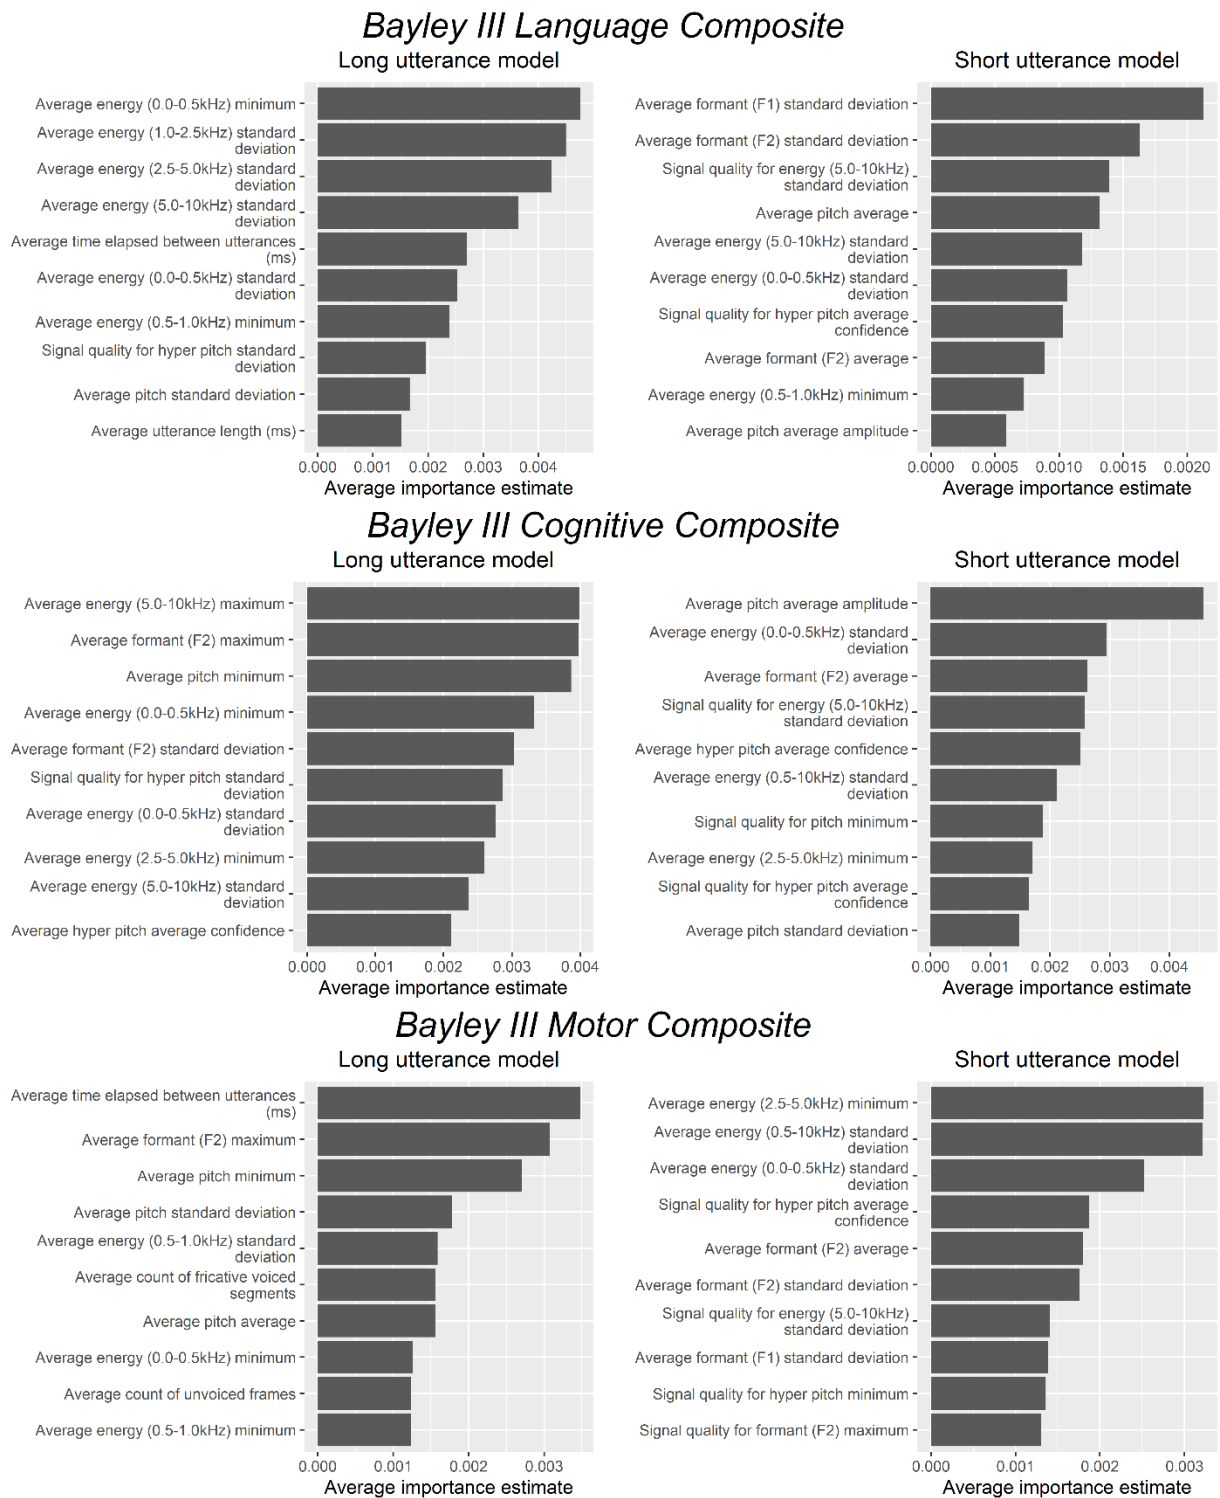

**eFigure 2.** Feature Importance Estimates From Models Predicting Bayley-III Composite Scores Using Cry Acoustic Characteristics (Only the Top 10 Features are Shown)

## Autism Screener

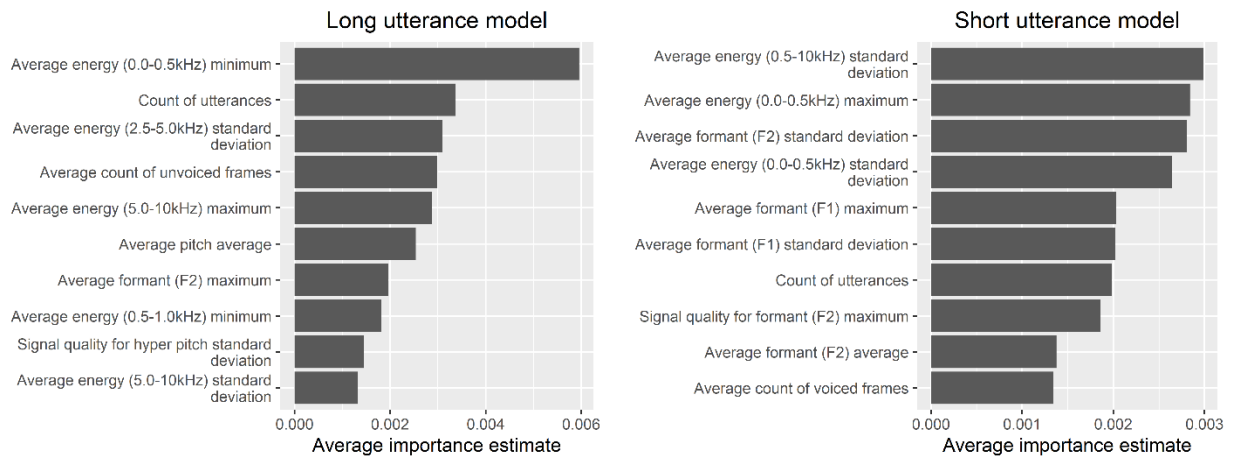

**eFigure 3.** Feature Importance Estimates From Models Predicting MCHAT Positive Autism Screen

Using Cry Acoustic Characteristics (Only the Top 10 Features are Shown)
