# Supplementary material for: Acoustic Cry Characteristics in Preterm Infants and Developmental and Behavioral Outcomes at 2 Years of Age
Source: PubMed Central journal article supplement (PMC9892956; doi:10.1001/jamanetworkopen.2022.54151), 2023-02-01
Supplement: jamanetwopen-e2254151-s002.pdf [file jamanetwopen-e2254151-s002.pdf]

## Data Sharing Statement

Manigault. Acoustic Cry Characteristics in Preterm Infants and Developmental and Behavioral Outcomes at 2 Years of Age. *JAMA Netw Open*. Published February 01, 2023.  
doi:10.1001/jamanetworkopen.2022.54151

### Data

**Data available:** No
